# Supplementary material for: Urban Local Government Coordination in Bangladesh with Reference to Four City Corporations
Source: Research Square preprint supplement (doi:10.21203/rs.3.rs-8123974/v1), 2025-11-28
Supplement: Supplementary file 1 [file c771a4b4b6406548209f1d9b.docx]

**Author List**

**Journal title:**

**Article title: “Urban Local Government Coordination in Bangladesh with Reference to Four City Corporations”**

”

Dear Editor-in-Chief,

We, all the authors of the manuscript, have studied your terms and conditions, and policy regarding the author list of the authors of the manuscript. All the authors of the manuscript are aware and agreed on the author list.

**Table**: Provide the complete and correct author list, in order, as it should appear on the article.

| Author’s full name | Institutional affiliation with address | Contact Details | Date |
| --- | --- | --- | --- |
| Mohammed Mahin Uddin | Assistant professor, Public Administration Department, Comilla University, Cumilla-3506, Bangladesh. | Mail: [mahin@cou.ac.bd](mailto:mahin@cou.ac.bd)  Contact Number: +8801925090867 | 30/07/2025 |
| Md. Zia Uddin | Associate Professor, Department of Public Administration, Comilla University, Cumilla-3506, Bangladesh. | Mail: [ziauddin@cou.ac.bd](mailto:ziauddin@cou.ac.bd)  Contact Number: +8801727658083 | 30/07/2025 |
| Zahedul Islam | Research Assistant, Development Thought (DT). And MSS, Public Administration Department, Comilla University, Cumilla 3506, Bangladesh | Mail: [zi.zahedulislam@gmail.com](mailto:zi.zahedulislam@gmail.com)  Contact Number: +8801580481017 | 30/07/2025 |
| Mojammel Hoque | Post-graduate Student, Public Administration Department, Comilla University, Cumilla 3506, Bangladesh | Mail: [hmtabriz553@stud.cou.ac.bd](mailto:hmtabriz553@stud.cou.ac.bd)  Contact Number: +8801957341040 | 30/07/2025 |
| Monirul Islam | Dr Monirul Islam, PhD Post-doctoral researcher, Centre for Policy Studies,  University College Cork, Ireland, | email:monirul2086@gmail.com, mislam@ucc.ie  Mob: 0830826846 | 30/07/2025 |
| Mohammad Al Amin | Post-graduate Student, Department of Public Administration, Comilla University, Cumilla-3506, Bangladesh. | Mail: [hossain.alamin5656@gmail.com](mailto:hossain.alamin5656@gmail.com)  Contact Number: +8801700653335 | 30/07/2025 |
